# Supplementary material
Source: MDPI journal article supplement (https://www.mdpi.com/2073-4395/10/11/1785)
Supplement: s1 [file s1]

## Supplementary Material

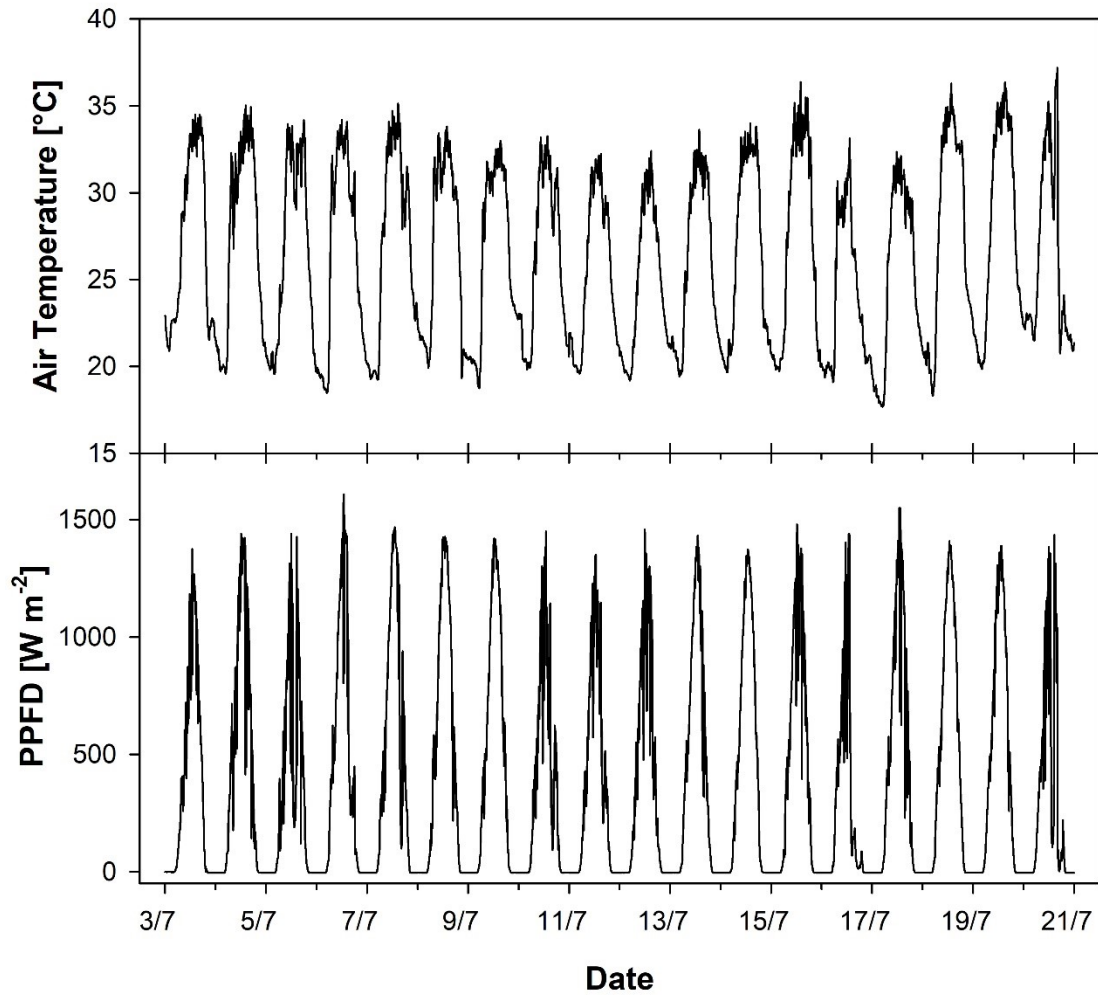

**Figure S1.** Air temperature (A) and Photosynthetic Photon Flux Density (PPFD) (B) measured at the weather station within the experimental tunnel at the University of Padova, Legnaro, Italy, during the water stress trial period.
